# Supplementary material for: Spatial Optimization Layout of Best Management Practices through SWAT and Interval Fractional Programming Under Uncertainty
Source: Research Square preprint supplement (doi:10.21203/rs.3.rs-509238/v1), 2021-06-07
Supplement: Supplementary file 1 [file 399e56a2b43ed04bdc858e02.docx]

**The related data in the study are listed.**

Table 1 The area of Ponds system and wetland in each BMPs scale in each sub basin (ha)

| No.  Scale | 0.2%*Asub.i | 0.4%*Asub.i | 0.6%*Asub.i | 0.8%*Asub.i | 1%*Asub.i |
| --- | --- | --- | --- | --- | --- |
| 1 | 5.81 | 11.62 | 17.43 | 23.24 | 29.05 |
| 2 | 5.47 | 10.94 | 16.41 | 21.88 | 27.35 |
| 3 | 0.00 | 0.00 | 0.01 | 0.01 | 0.01 |
| 4 | 0.74 | 1.49 | 2.23 | 2.98 | 3.72 |
| 5 | 5.10 | 10.21 | 15.31 | 20.41 | 25.52 |
| 6 | 0.47 | 0.94 | 1.40 | 1.87 | 2.34 |
| 7 | 8.20 | 16.39 | 24.59 | 32.78 | 40.98 |
| 8 | 3.00 | 6.01 | 9.01 | 12.01 | 15.01 |
| 9 | 0.13 | 0.26 | 0.39 | 0.52 | 0.64 |
| 10 | 6.95 | 13.90 | 20.86 | 27.81 | 34.76 |
| 11 | 0.26 | 0.53 | 0.79 | 1.05 | 1.31 |
| 12 | 3.66 | 7.32 | 10.98 | 14.64 | 18.30 |
| 13 | 5.51 | 11.02 | 16.52 | 22.03 | 27.54 |
| 14 | 6.11 | 12.21 | 18.32 | 24.42 | 30.53 |
| 15 | 1.31 | 2.61 | 3.92 | 5.22 | 6.53 |
| 16 | 2.75 | 5.50 | 8.25 | 11.00 | 13.75 |
| 17 | 2.92 | 5.85 | 8.77 | 11.69 | 14.62 |
| 18 | 2.93 | 5.86 | 8.79 | 11.72 | 14.65 |
| 19 | 2.75 | 5.49 | 8.24 | 10.98 | 13.73 |
| 20 | 0.00 | 0.01 | 0.01 | 0.01 | 0.02 |
| 21 | 1.97 | 3.95 | 5.92 | 7.89 | 9.86 |
| 22 | 2.01 | 4.02 | 6.03 | 8.04 | 10.05 |
| 23 | 3.47 | 6.94 | 10.42 | 13.89 | 17.36 |
| 24 | 3.28 | 6.57 | 9.85 | 13.13 | 16.41 |
| 25 | 1.00 | 2.00 | 3.00 | 4.01 | 5.01 |
| 26 | 2.78 | 5.56 | 8.34 | 11.12 | 13.90 |
| 27 | 3.36 | 6.72 | 10.07 | 13.43 | 16.79 |
| 28 | 0.34 | 0.68 | 1.02 | 1.36 | 1.70 |
| 29 | 0.07 | 0.15 | 0.22 | 0.30 | 0.37 |
| 30 | 2.40 | 4.80 | 7.20 | 9.60 | 12.00 |
| 31 | 1.48 | 2.96 | 4.45 | 5.93 | 7.41 |

Table 2 The volume of treated runoff by wetland in each BMPs scale in each sub basin (m3)

| No.  Scale | 0.2%*Asub.i | 0.4%*Asub.i | 0.6%*Asub.i | 0.8%*Asub.i | 1%*Asub.i |
| --- | --- | --- | --- | --- | --- |
| 1 | 289367.54 | 578735.07 | 868102.61 | 1157470.14 | 1446837.68 |
| 2 | 272411.23 | 544822.45 | 817233.68 | 1089644.91 | 1362056.14 |
| 3 | 114.29 | 228.59 | 342.88 | 457.18 | 571.47 |
| 4 | 37088.35 | 74176.71 | 111265.06 | 148353.41 | 185441.77 |
| 5 | 254140.54 | 508281.08 | 762421.62 | 1016562.16 | 1270702.69 |
| 6 | 23315.95 | 46631.89 | 69947.84 | 93263.78 | 116579.73 |
| 7 | 408143.34 | 816286.68 | 1224430.01 | 1632573.35 | 2040716.69 |
| 8 | 149545.34 | 299090.68 | 448636.02 | 598181.35 | 747726.69 |
| 9 | 6416.78 | 12833.57 | 19250.35 | 25667.13 | 32083.92 |
| 10 | 346220.56 | 692441.13 | 1038661.69 | 1384882.25 | 1731102.81 |
| 11 | 13086.65 | 26173.29 | 39259.94 | 52346.58 | 65433.23 |
| 12 | 182249.71 | 364499.41 | 546749.12 | 728998.83 | 911248.54 |
| 13 | 274313.40 | 548626.81 | 822940.21 | 1097253.61 | 1371567.02 |
| 14 | 304078.79 | 608157.57 | 912236.36 | 1216315.15 | 1520393.94 |
| 15 | 65008.71 | 130017.42 | 195026.13 | 260034.84 | 325043.54 |
| 16 | 136940.36 | 273880.72 | 410821.08 | 547761.44 | 684701.80 |
| 17 | 145577.71 | 291155.42 | 436733.13 | 582310.84 | 727888.54 |
| 18 | 145936.92 | 291873.84 | 437810.75 | 583747.67 | 729684.59 |
| 19 | 136752.59 | 273505.18 | 410257.77 | 547010.36 | 683762.96 |
| 20 | 171.44 | 342.88 | 514.32 | 685.76 | 857.20 |
| 21 | 98251.89 | 196503.78 | 294755.68 | 393007.57 | 491259.46 |
| 22 | 100088.76 | 200177.52 | 300266.27 | 400355.03 | 500443.79 |
| 23 | 172902.10 | 345804.21 | 518706.31 | 691608.42 | 864510.52 |
| 24 | 163472.86 | 326945.72 | 490418.58 | 653891.44 | 817364.30 |
| 25 | 49881.10 | 99762.20 | 149643.30 | 199524.40 | 249405.51 |
| 26 | 138450.67 | 276901.34 | 415352.01 | 553802.69 | 692253.36 |
| 27 | 167220.07 | 334440.13 | 501660.20 | 668880.27 | 836100.33 |
| 28 | 16972.64 | 33945.27 | 50917.91 | 67890.55 | 84863.18 |
| 29 | 3681.89 | 7363.79 | 11045.68 | 14727.58 | 18409.47 |
| 30 | 119494.22 | 238988.44 | 358482.66 | 477976.88 | 597471.10 |
| 31 | 73825.66 | 147651.33 | 221476.99 | 295302.65 | 369128.32 |

Table 3 The volume of treated runoff by wetland in each BMPs scale in each sub basin (m3)

| No.  Scale | 0.2%*Asub.i | 0.4%*Asub.i | 0.6%*Asub.i | 0.8%*Asub.i | 1%*Asub.i |
| --- | --- | --- | --- | --- | --- |
| 1 | 128646.53 | 257293.06 | 385939.59 | 514586.12 | 643232.66 |
| 2 | 121108.12 | 242216.25 | 363324.37 | 484432.50 | 605540.62 |
| 3 | 50.81 | 101.63 | 152.44 | 203.25 | 254.06 |
| 4 | 16488.68 | 32977.36 | 49466.03 | 65954.71 | 82443.39 |
| 5 | 112985.37 | 225970.74 | 338956.12 | 451941.49 | 564926.86 |
| 6 | 10365.76 | 20731.53 | 31097.29 | 41463.06 | 51828.82 |
| 7 | 181451.68 | 362903.35 | 544355.03 | 725806.71 | 907258.38 |
| 8 | 66484.61 | 132969.23 | 199453.84 | 265938.46 | 332423.07 |
| 9 | 2852.76 | 5705.53 | 8558.29 | 11411.05 | 14263.81 |
| 10 | 153922.15 | 307844.31 | 461766.46 | 615688.62 | 769610.77 |
| 11 | 5818.04 | 11636.08 | 17454.12 | 23272.16 | 29090.20 |
| 12 | 81024.27 | 162048.53 | 243072.80 | 324097.07 | 405121.34 |
| 13 | 121953.79 | 243907.58 | 365861.37 | 487815.16 | 609768.95 |
| 14 | 135186.83 | 270373.67 | 405560.50 | 540747.34 | 675934.17 |
| 15 | 28901.46 | 57802.92 | 86704.39 | 115605.85 | 144507.31 |
| 16 | 60880.71 | 121761.43 | 182642.14 | 243522.86 | 304403.57 |
| 17 | 64720.69 | 129441.38 | 194162.08 | 258882.77 | 323603.46 |
| 18 | 64880.39 | 129760.78 | 194641.17 | 259521.56 | 324401.94 |
| 19 | 60797.24 | 121594.47 | 182391.71 | 243188.95 | 303986.18 |
| 20 | 76.22 | 152.44 | 228.66 | 304.88 | 381.09 |
| 21 | 43680.66 | 87361.32 | 131041.98 | 174722.64 | 218403.30 |
| 22 | 44497.29 | 88994.58 | 133491.87 | 177989.16 | 222486.46 |
| 23 | 76868.53 | 153737.05 | 230605.58 | 307474.10 | 384342.63 |
| 24 | 72676.49 | 145352.98 | 218029.46 | 290705.95 | 363382.44 |
| 25 | 22176.06 | 44352.11 | 66528.17 | 88704.22 | 110880.28 |
| 26 | 61552.17 | 123104.33 | 184656.50 | 246208.66 | 307760.83 |
| 27 | 74342.42 | 148684.83 | 223027.25 | 297369.66 | 371712.08 |
| 28 | 7545.67 | 15091.33 | 22637.00 | 30182.66 | 37728.33 |
| 29 | 1636.89 | 3273.78 | 4910.67 | 6547.56 | 8184.45 |
| 30 | 53124.54 | 106249.08 | 159373.62 | 212498.16 | 265622.69 |
| 31 | 32821.29 | 65642.58 | 98463.87 | 131285.16 | 164106.45 |

Table 4 The volume of P which could be treated by Ponds system in each BMPs scale in each sub basin (kg)

| No.  Scale | 0.2%*Asub.i | 0.4%*Asub.i | 0.6%*Asub.i | 0.8%*Asub.i | 1%*Asub.i |
| --- | --- | --- | --- | --- | --- |
| 1 | 410.17 | 820.34 | 1230.51 | 1640.68 | 2050.85 |
| 2 | 379.09 | 758.19 | 1137.28 | 1516.37 | 1895.47 |
| 3 | 0.11 | 0.23 | 0.34 | 0.46 | 0.57 |
| 4 | 24.86 | 49.72 | 74.59 | 99.45 | 124.31 |
| 5 | 343.44 | 686.88 | 1030.32 | 1373.77 | 1717.21 |
| 6 | 45.73 | 91.46 | 137.19 | 182.91 | 228.64 |
| 7 | 689.00 | 1378.00 | 2067.00 | 2756.00 | 3445.00 |
| 8 | 215.25 | 430.50 | 645.75 | 860.99 | 1076.24 |
| 9 | 10.57 | 21.13 | 31.70 | 42.26 | 52.83 |
| 10 | 688.83 | 1377.66 | 2066.48 | 2755.31 | 3444.14 |
| 11 | 27.67 | 55.34 | 83.02 | 110.69 | 138.36 |
| 12 | 281.25 | 562.50 | 843.76 | 1125.01 | 1406.26 |
| 13 | 457.41 | 914.81 | 1372.22 | 1829.63 | 2287.03 |
| 14 | 536.23 | 1072.46 | 1608.69 | 2144.91 | 2681.14 |
| 15 | 129.72 | 259.44 | 389.15 | 518.87 | 648.59 |
| 16 | 271.75 | 543.50 | 815.25 | 1086.99 | 1358.74 |
| 17 | 204.61 | 409.21 | 613.82 | 818.43 | 1023.03 |
| 18 | 282.05 | 564.10 | 846.15 | 1128.19 | 1410.24 |
| 19 | 236.00 | 472.00 | 708.01 | 944.01 | 1180.01 |
| 20 | 0.21 | 0.42 | 0.63 | 0.84 | 1.05 |
| 21 | 208.05 | 416.10 | 624.15 | 832.21 | 1040.26 |
| 22 | 78.95 | 157.91 | 236.86 | 315.81 | 394.76 |
| 23 | 267.12 | 534.25 | 801.37 | 1068.49 | 1335.62 |
| 24 | 221.04 | 442.07 | 663.11 | 884.14 | 1105.18 |
| 25 | 82.82 | 165.65 | 248.47 | 331.30 | 414.12 |
| 26 | 205.81 | 411.61 | 617.42 | 823.22 | 1029.03 |
| 27 | 219.69 | 439.38 | 659.07 | 878.76 | 1098.45 |
| 28 | 31.99 | 63.99 | 95.98 | 127.98 | 159.97 |
| 29 | 6.54 | 13.09 | 19.63 | 26.17 | 32.71 |
| 30 | 179.49 | 358.99 | 538.48 | 717.97 | 897.47 |
| 31 | 122.35 | 244.70 | 367.06 | 489.41 | 611.76 |

Table 5 The volume of P which could be treated by wetland in each BMPs scale in each sub basin (kg)

| No.  Scale | 0.2%*Asub.i | 0.4%*Asub.i | 0.6%*Asub.i | 0.8%*Asub.i | 1%*Asub.i |
| --- | --- | --- | --- | --- | --- |
| 1 | 182.35 | 364.71 | 547.06 | 729.41 | 911.76 |
| 2 | 168.54 | 337.07 | 505.61 | 674.15 | 842.68 |
| 3 | 0.05 | 0.10 | 0.15 | 0.20 | 0.25 |
| 4 | 11.05 | 22.11 | 33.16 | 44.21 | 55.27 |
| 5 | 152.69 | 305.37 | 458.06 | 610.75 | 763.43 |
| 6 | 20.33 | 40.66 | 60.99 | 81.32 | 101.65 |
| 7 | 306.31 | 612.63 | 918.94 | 1225.26 | 1531.57 |
| 8 | 95.69 | 191.39 | 287.08 | 382.78 | 478.47 |
| 9 | 4.70 | 9.39 | 14.09 | 18.79 | 23.49 |
| 10 | 306.24 | 612.48 | 918.71 | 1224.95 | 1531.19 |
| 11 | 12.30 | 24.60 | 36.91 | 49.21 | 61.51 |
| 12 | 125.04 | 250.08 | 375.12 | 500.15 | 625.19 |
| 13 | 203.35 | 406.71 | 610.06 | 813.41 | 1016.77 |
| 14 | 238.40 | 476.79 | 715.19 | 953.58 | 1191.98 |
| 15 | 57.67 | 115.34 | 173.01 | 230.68 | 288.35 |
| 16 | 120.81 | 241.63 | 362.44 | 483.25 | 604.07 |
| 17 | 90.96 | 181.93 | 272.89 | 363.85 | 454.82 |
| 18 | 125.39 | 250.79 | 376.18 | 501.57 | 626.96 |
| 19 | 104.92 | 209.84 | 314.76 | 419.69 | 524.61 |
| 20 | 0.09 | 0.19 | 0.28 | 0.37 | 0.47 |
| 21 | 92.50 | 184.99 | 277.49 | 369.98 | 462.48 |
| 22 | 35.10 | 70.20 | 105.30 | 140.40 | 175.50 |
| 23 | 118.76 | 237.51 | 356.27 | 475.03 | 593.79 |
| 24 | 98.27 | 196.54 | 294.80 | 393.07 | 491.34 |
| 25 | 36.82 | 73.64 | 110.46 | 147.29 | 184.11 |
| 26 | 91.50 | 182.99 | 274.49 | 365.99 | 457.48 |
| 27 | 97.67 | 195.34 | 293.01 | 390.68 | 488.35 |
| 28 | 14.22 | 28.45 | 42.67 | 56.90 | 71.12 |
| 29 | 2.91 | 5.82 | 8.73 | 11.63 | 14.54 |
| 30 | 79.80 | 159.60 | 239.40 | 319.20 | 398.99 |
| 31 | 54.39 | 108.79 | 163.18 | 217.58 | 271.97 |

Table 6 The volume of P which could be treated by ponds system in each BMPs scale in each sub basin(kg) (low limit scenario)

| No.  Scale | 0.2%*Asub.i | 0.4%*Asub.i | 0.6%*Asub.i | 0.8%*Asub.i | 1%*Asub.i |
| --- | --- | --- | --- | --- | --- |
| 1 | 328.14 | 656.27 | 984.41 | 1312.54 | 1640.68 |
| 2 | 303.27 | 606.55 | 909.82 | 1213.10 | 1516.37 |
| 3 | 0.09 | 0.18 | 0.27 | 0.37 | 0.46 |
| 4 | 19.89 | 39.78 | 59.67 | 79.56 | 99.45 |
| 5 | 274.75 | 549.51 | 824.26 | 1099.01 | 1373.77 |
| 6 | 36.58 | 73.17 | 109.75 | 146.33 | 182.91 |
| 7 | 551.20 | 1102.40 | 1653.60 | 2204.80 | 2756.00 |
| 8 | 172.20 | 344.40 | 516.60 | 688.80 | 860.99 |
| 9 | 8.45 | 16.91 | 25.36 | 33.81 | 42.26 |
| 10 | 551.06 | 1102.12 | 1653.19 | 2204.25 | 2755.31 |
| 11 | 22.14 | 44.27 | 66.41 | 88.55 | 110.69 |
| 12 | 225.00 | 450.00 | 675.01 | 900.01 | 1125.01 |
| 13 | 365.93 | 731.85 | 1097.78 | 1463.70 | 1829.63 |
| 14 | 428.98 | 857.97 | 1286.95 | 1715.93 | 2144.91 |
| 15 | 103.77 | 207.55 | 311.32 | 415.10 | 518.87 |
| 16 | 217.40 | 434.80 | 652.20 | 869.59 | 1086.99 |
| 17 | 163.69 | 327.37 | 491.06 | 654.74 | 818.43 |
| 18 | 225.64 | 451.28 | 676.92 | 902.56 | 1128.19 |
| 19 | 188.80 | 377.60 | 566.41 | 755.21 | 944.01 |
| 20 | 0.17 | 0.34 | 0.50 | 0.67 | 0.84 |
| 21 | 166.44 | 332.88 | 499.32 | 665.77 | 832.21 |
| 22 | 63.16 | 126.32 | 189.49 | 252.65 | 315.81 |
| 23 | 213.70 | 427.40 | 641.10 | 854.79 | 1068.49 |
| 24 | 176.83 | 353.66 | 530.49 | 707.32 | 884.14 |
| 25 | 66.26 | 132.52 | 198.78 | 265.04 | 331.30 |
| 26 | 164.64 | 329.29 | 493.93 | 658.58 | 823.22 |
| 27 | 175.75 | 351.50 | 527.25 | 703.01 | 878.76 |
| 28 | 25.60 | 51.19 | 76.79 | 102.38 | 127.98 |
| 29 | 5.23 | 10.47 | 15.70 | 20.94 | 26.17 |
| 30 | 143.59 | 287.19 | 430.78 | 574.38 | 717.97 |
| 31 | 97.88 | 195.76 | 293.64 | 391.53 | 489.41 |

Table 7 The volume of P which could be treated by ponds system in each BMPs scale in each sub basin (kg) (upper limit scenario)

| No.  Scale | 0.2%*Asub.i | 0.4%*Asub.i | 0.6%*Asub.i | 0.8%*Asub.i | 1%*Asub.i |
| --- | --- | --- | --- | --- | --- |
| 1 | 369.15 | 738.31 | 1107.46 | 1476.61 | 1845.76 |
| 2 | 341.18 | 682.37 | 1023.55 | 1364.74 | 1705.92 |
| 3 | 0.10 | 0.21 | 0.31 | 0.41 | 0.52 |
| 4 | 22.38 | 44.75 | 67.13 | 89.50 | 111.88 |
| 5 | 309.10 | 618.19 | 927.29 | 1236.39 | 1545.49 |
| 6 | 41.16 | 82.31 | 123.47 | 164.62 | 205.78 |
| 7 | 620.10 | 1240.20 | 1860.30 | 2480.40 | 3100.50 |
| 8 | 193.72 | 387.45 | 581.17 | 774.90 | 968.62 |
| 9 | 9.51 | 19.02 | 28.53 | 38.04 | 47.55 |
| 10 | 619.94 | 1239.89 | 1859.83 | 2479.78 | 3099.72 |
| 11 | 24.90 | 49.81 | 74.71 | 99.62 | 124.52 |
| 12 | 253.13 | 506.25 | 759.38 | 1012.51 | 1265.63 |
| 13 | 411.67 | 823.33 | 1235.00 | 1646.67 | 2058.33 |
| 14 | 482.61 | 965.21 | 1447.82 | 1930.42 | 2413.03 |
| 15 | 116.75 | 233.49 | 350.24 | 466.98 | 583.73 |
| 16 | 244.57 | 489.15 | 733.72 | 978.29 | 1222.87 |
| 17 | 184.15 | 368.29 | 552.44 | 736.58 | 920.73 |
| 18 | 253.84 | 507.69 | 761.53 | 1015.37 | 1269.22 |
| 19 | 212.40 | 424.80 | 637.21 | 849.61 | 1062.01 |
| 20 | 0.19 | 0.38 | 0.57 | 0.75 | 0.94 |
| 21 | 187.25 | 374.49 | 561.74 | 748.99 | 936.23 |
| 22 | 71.06 | 142.11 | 213.17 | 284.23 | 355.29 |
| 23 | 240.41 | 480.82 | 721.23 | 961.64 | 1202.05 |
| 24 | 198.93 | 397.86 | 596.80 | 795.73 | 994.66 |
| 25 | 74.54 | 149.08 | 223.62 | 298.17 | 372.71 |
| 26 | 185.23 | 370.45 | 555.68 | 740.90 | 926.13 |
| 27 | 197.72 | 395.44 | 593.16 | 790.88 | 988.60 |
| 28 | 28.79 | 57.59 | 86.38 | 115.18 | 143.97 |
| 29 | 5.89 | 11.78 | 17.67 | 23.55 | 29.44 |
| 30 | 161.54 | 323.09 | 484.63 | 646.18 | 807.72 |
| 31 | 110.12 | 220.23 | 330.35 | 440.47 | 550.58 |

Table 8 The efficiency of P treatment of wetland in each BMPs scale in each sub basin (kg) (lower limit scenario)

| No.  Scale | 0.2%*Asub.i | 0.4%*Asub.i | 0.6%*Asub.i | 0.8%*Asub.i | 1%*Asub.i |
| --- | --- | --- | --- | --- | --- |
| 1 | 45.59 | 91.18 | 136.76 | 182.35 | 227.94 |
| 2 | 42.13 | 84.27 | 126.40 | 168.54 | 210.67 |
| 3 | 0.01 | 0.03 | 0.04 | 0.05 | 0.06 |
| 4 | 2.76 | 5.53 | 8.29 | 11.05 | 13.82 |
| 5 | 38.17 | 76.34 | 114.51 | 152.69 | 190.86 |
| 6 | 5.08 | 10.16 | 15.25 | 20.33 | 25.41 |
| 7 | 76.58 | 153.16 | 229.74 | 306.31 | 382.89 |
| 8 | 23.92 | 47.85 | 71.77 | 95.69 | 119.62 |
| 9 | 1.17 | 2.35 | 3.52 | 4.70 | 5.87 |
| 10 | 76.56 | 153.12 | 229.68 | 306.24 | 382.80 |
| 11 | 3.08 | 6.15 | 9.23 | 12.30 | 15.38 |
| 12 | 31.26 | 62.52 | 93.78 | 125.04 | 156.30 |
| 13 | 50.84 | 101.68 | 152.51 | 203.35 | 254.19 |
| 14 | 59.60 | 119.20 | 178.80 | 238.40 | 297.99 |
| 15 | 14.42 | 28.83 | 43.25 | 57.67 | 72.09 |
| 16 | 30.20 | 60.41 | 90.61 | 120.81 | 151.02 |
| 17 | 22.74 | 45.48 | 68.22 | 90.96 | 113.70 |
| 18 | 31.35 | 62.70 | 94.04 | 125.39 | 156.74 |
| 19 | 26.23 | 52.46 | 78.69 | 104.92 | 131.15 |
| 20 | 0.02 | 0.05 | 0.07 | 0.09 | 0.12 |
| 21 | 23.12 | 46.25 | 69.37 | 92.50 | 115.62 |
| 22 | 8.78 | 17.55 | 26.33 | 35.10 | 43.88 |
| 23 | 29.69 | 59.38 | 89.07 | 118.76 | 148.45 |
| 24 | 24.57 | 49.13 | 73.70 | 98.27 | 122.83 |
| 25 | 9.21 | 18.41 | 27.62 | 36.82 | 46.03 |
| 26 | 22.87 | 45.75 | 68.62 | 91.50 | 114.37 |
| 27 | 24.42 | 48.83 | 73.25 | 97.67 | 122.09 |
| 28 | 3.56 | 7.11 | 10.67 | 14.22 | 17.78 |
| 29 | 0.73 | 1.45 | 2.18 | 2.91 | 3.64 |
| 30 | 19.95 | 39.90 | 59.85 | 79.80 | 99.75 |
| 31 | 13.60 | 27.20 | 40.80 | 54.39 | 67.99 |

Table 9 The efficiency of P treatment of wetland in each BMPs scale in each sub basin (kg) (upper limit scenario)

| No.  Scale | 0.2%*Asub.i | 0.4%*Asub.i | 0.6%*Asub.i | 0.8%*Asub.i | 1%*Asub.i |
| --- | --- | --- | --- | --- | --- |
| 1 | 164.12 | 328.23 | 492.35 | 656.47 | 820.59 |
| 2 | 151.68 | 303.37 | 455.05 | 606.73 | 758.41 |
| 3 | 0.05 | 0.09 | 0.14 | 0.18 | 0.23 |
| 4 | 9.95 | 19.90 | 29.84 | 39.79 | 49.74 |
| 5 | 137.42 | 274.84 | 412.25 | 549.67 | 687.09 |
| 6 | 18.30 | 36.59 | 54.89 | 73.19 | 91.48 |
| 7 | 275.68 | 551.37 | 827.05 | 1102.73 | 1378.41 |
| 8 | 86.13 | 172.25 | 258.38 | 344.50 | 430.63 |
| 9 | 4.23 | 8.46 | 12.68 | 16.91 | 21.14 |
| 10 | 275.61 | 551.23 | 826.84 | 1102.46 | 1378.07 |
| 11 | 11.07 | 22.14 | 33.22 | 44.29 | 55.36 |
| 12 | 112.53 | 225.07 | 337.60 | 450.14 | 562.67 |
| 13 | 183.02 | 366.04 | 549.05 | 732.07 | 915.09 |
| 14 | 214.56 | 429.11 | 643.67 | 858.22 | 1072.78 |
| 15 | 51.90 | 103.81 | 155.71 | 207.61 | 259.51 |
| 16 | 108.73 | 217.46 | 326.20 | 434.93 | 543.66 |
| 17 | 81.87 | 163.73 | 245.60 | 327.47 | 409.34 |
| 18 | 112.85 | 225.71 | 338.56 | 451.41 | 564.27 |
| 19 | 94.43 | 188.86 | 283.29 | 377.72 | 472.15 |
| 20 | 0.08 | 0.17 | 0.25 | 0.34 | 0.42 |
| 21 | 83.25 | 166.49 | 249.74 | 332.98 | 416.23 |
| 22 | 31.59 | 63.18 | 94.77 | 126.36 | 157.95 |
| 23 | 106.88 | 213.76 | 320.64 | 427.53 | 534.41 |
| 24 | 88.44 | 176.88 | 265.32 | 353.76 | 442.21 |
| 25 | 33.14 | 66.28 | 99.42 | 132.56 | 165.70 |
| 26 | 82.35 | 164.69 | 247.04 | 329.39 | 411.74 |
| 27 | 87.90 | 175.80 | 263.71 | 351.61 | 439.51 |
| 28 | 12.80 | 25.60 | 38.40 | 51.21 | 64.01 |
| 29 | 2.62 | 5.24 | 7.85 | 10.47 | 13.09 |
| 30 | 71.82 | 143.64 | 215.46 | 287.28 | 359.10 |
| 31 | 48.96 | 97.91 | 146.87 | 195.82 | 244.78 |

Table 10 The efficiency of P treatment of vegetation buffer in each BMPs scale in each sub basin (kg) (lower limit scenario)

| No.  Scale | 0.2%*Asub.i | 0.4%*Asub.i | 0.6%*Asub.i | 0.8%*Asub.i | 1%*Asub.i |
| --- | --- | --- | --- | --- | --- |
| 1 | 4038.07 | 5518.70 | 7268.53 | 9287.56 | 10364.38 |
| 2 | 3390.37 | 4633.51 | 6102.67 | 7797.85 | 8701.95 |
| 3 | 1.42 | 1.94 | 2.56 | 3.27 | 3.64 |
| 4 | 419.81 | 573.74 | 755.66 | 965.57 | 1077.52 |
| 5 | 3499.79 | 4783.05 | 6299.62 | 8049.52 | 8982.80 |
| 6 | 420.88 | 575.20 | 757.59 | 968.03 | 1080.26 |
| 7 | 5237.02 | 7157.26 | 9426.64 | 12045.15 | 13441.68 |
| 8 | 1855.35 | 2535.65 | 3339.64 | 4267.31 | 4762.07 |
| 9 | 128.14 | 175.13 | 230.66 | 294.73 | 328.90 |
| 10 | 4452.90 | 6085.63 | 8015.21 | 10241.66 | 11429.10 |
| 11 | 313.45 | 428.38 | 564.21 | 720.93 | 804.52 |
| 12 | 2230.36 | 3048.16 | 4014.65 | 5129.84 | 5724.60 |
| 13 | 2022.65 | 2764.29 | 3640.77 | 4652.09 | 5191.46 |
| 14 | 3866.01 | 5283.55 | 6958.82 | 8891.83 | 9922.77 |
| 15 | 1187.39 | 1622.76 | 2137.30 | 2730.99 | 3047.63 |
| 16 | 2670.34 | 3649.46 | 4806.61 | 6141.78 | 6853.87 |
| 17 | 2146.39 | 2933.41 | 3863.51 | 4936.71 | 5509.08 |
| 18 | 1882.67 | 2572.99 | 3388.81 | 4330.15 | 4832.20 |
| 19 | 2297.61 | 3140.06 | 4135.69 | 5284.50 | 5897.19 |
| 20 | 2.60 | 3.55 | 4.67 | 5.97 | 6.66 |
| 21 | 1032.24 | 1410.72 | 1858.03 | 2374.14 | 2649.41 |
| 22 | 1181.77 | 1615.09 | 2127.19 | 2718.07 | 3033.21 |
| 23 | 3210.15 | 4387.20 | 5778.26 | 7383.34 | 8239.38 |
| 24 | 2668.74 | 3647.28 | 4803.74 | 6138.11 | 6849.78 |
| 25 | 1012.35 | 1383.54 | 1822.22 | 2328.40 | 2598.35 |
| 26 | 2478.35 | 3387.08 | 4461.03 | 5700.21 | 6361.10 |
| 27 | 2634.22 | 3600.10 | 4741.60 | 6058.71 | 6761.16 |
| 28 | 395.18 | 540.07 | 711.32 | 908.91 | 1014.29 |
| 29 | 81.02 | 110.73 | 145.84 | 186.35 | 207.96 |
| 30 | 2202.36 | 3009.90 | 3964.26 | 5065.44 | 5652.74 |
| 31 | 1489.63 | 2035.83 | 2681.34 | 3426.16 | 3823.39 |

Table 11 The efficiency of P treatment of vegetation buffer in each BMPs scale in each sub basin (kg) (upper limit scenario)

| No.  Scale | 2m | 5m | 10m | 15m | 20m |
| --- | --- | --- | --- | --- | --- |
| 1 | 5114.89 | 6864.72 | 8883.76 | 10633.59 | 11172.00 |
| 2 | 4294.47 | 5763.63 | 7458.82 | 8927.98 | 9380.03 |
| 3 | 1.80 | 2.41 | 3.12 | 3.74 | 3.93 |
| 4 | 531.76 | 713.68 | 923.59 | 1105.51 | 1161.48 |
| 5 | 4433.07 | 5949.64 | 7699.54 | 9216.12 | 9682.75 |
| 6 | 533.12 | 715.50 | 925.94 | 1108.32 | 1164.44 |
| 7 | 6633.56 | 8902.93 | 11521.44 | 13790.82 | 14489.09 |
| 8 | 2350.11 | 3154.10 | 4081.78 | 4885.76 | 5133.14 |
| 9 | 162.31 | 217.84 | 281.91 | 337.44 | 354.53 |
| 10 | 5640.34 | 7569.92 | 9796.37 | 11725.96 | 12319.68 |
| 11 | 397.04 | 532.86 | 689.59 | 825.42 | 867.21 |
| 12 | 2825.13 | 3791.62 | 4906.80 | 5873.29 | 6170.67 |
| 13 | 2562.02 | 3438.50 | 4449.83 | 5326.31 | 5595.99 |
| 14 | 4896.95 | 6572.22 | 8505.23 | 10180.50 | 10695.97 |
| 15 | 1504.02 | 2018.56 | 2612.25 | 3126.79 | 3285.11 |
| 16 | 3382.43 | 4539.57 | 5874.74 | 7031.89 | 7387.93 |
| 17 | 2718.77 | 3648.87 | 4722.07 | 5652.17 | 5938.36 |
| 18 | 2384.72 | 3200.55 | 4141.88 | 4957.71 | 5208.73 |
| 19 | 2910.30 | 3905.93 | 5054.74 | 6050.37 | 6356.72 |
| 20 | 3.29 | 4.41 | 5.71 | 6.84 | 7.18 |
| 21 | 1307.50 | 1754.80 | 2270.92 | 2718.22 | 2855.85 |
| 22 | 1496.91 | 2009.01 | 2599.90 | 3112.00 | 3269.57 |
| 23 | 4066.19 | 5457.25 | 7062.32 | 8453.39 | 8881.40 |
| 24 | 3380.41 | 4536.86 | 5871.24 | 7027.69 | 7383.52 |
| 25 | 1282.30 | 1720.99 | 2227.16 | 2665.84 | 2800.82 |
| 26 | 3139.24 | 4213.20 | 5452.37 | 6526.32 | 6856.77 |
| 27 | 3336.68 | 4478.17 | 5795.28 | 6936.78 | 7288.01 |
| 28 | 500.56 | 671.80 | 869.39 | 1040.63 | 1093.32 |
| 29 | 102.63 | 137.74 | 178.25 | 213.36 | 224.17 |
| 30 | 2789.66 | 3744.02 | 4845.20 | 5799.56 | 6093.21 |
| 31 | 1886.87 | 2532.38 | 3277.19 | 3922.70 | 4121.32 |
